# Supplementary material for: A Neuron-Specific Antiviral Mechanism Prevents Lethal Flaviviral Infection of Mosquitoes
Source: PubMed Central journal article supplement (PMC4411065; doi:10.1371/journal.ppat.1004848), 2015-04-27
Supplement: ppat.1004848.s005.pdf [file ppat.1004848.s005.pdf]

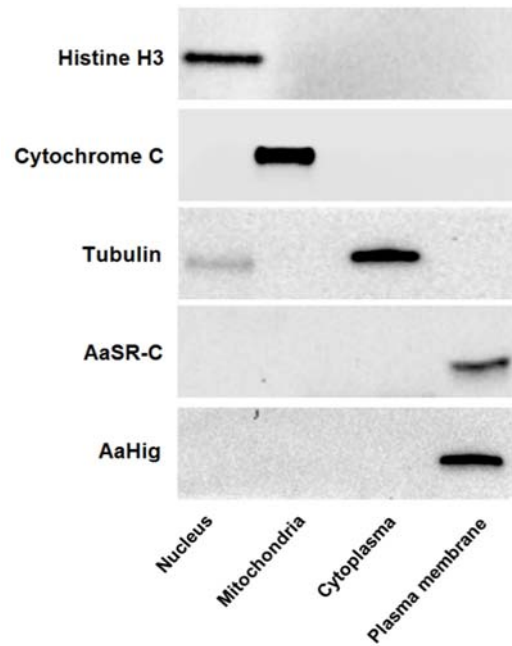

**S5 Fig. The subcellular localization of AaHig**

The subcellular fractionations, including nucleus, mitochondria, cytoplasm and plasma membrane, were separated and validated by their featured markers. AaSR-C, a transmembrane protein in *A. aegypti*, was used as a marker of plasma membrane [11].
