# Supplementary material for: A Neuron-Specific Antiviral Mechanism Prevents Lethal Flaviviral Infection of Mosquitoes
Source: PubMed Central journal article supplement (PMC4411065; doi:10.1371/journal.ppat.1004848), 2015-04-27
Supplement: ppat.1004848.s008.pdf [file ppat.1004848.s008.pdf]

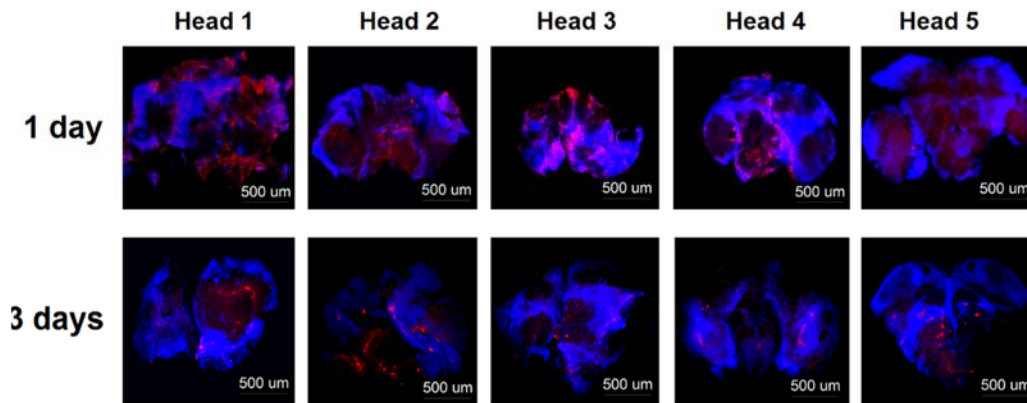

**S8 Fig. Comparison of the distribution of murine AaHig antibody in different mosquito brains**

The 1:10 diluted AaHig murine antibody was microinjected into mosquito thorax and the brain tissues were isolated for staining by anti-mouse IgG-Alexa 546. Nuclei were stained with To-Pro-3 iodide (Blue). Images were examined using a Zeiss LSM 780 meta confocal microscope.
