# Supplementary material for: A Neuron-Specific Antiviral Mechanism Prevents Lethal Flaviviral Infection of Mosquitoes
Source: PubMed Central journal article supplement (PMC4411065; doi:10.1371/journal.ppat.1004848), 2015-04-27
Supplement: ppat.1004848.s010.pdf [file ppat.1004848.s010.pdf]

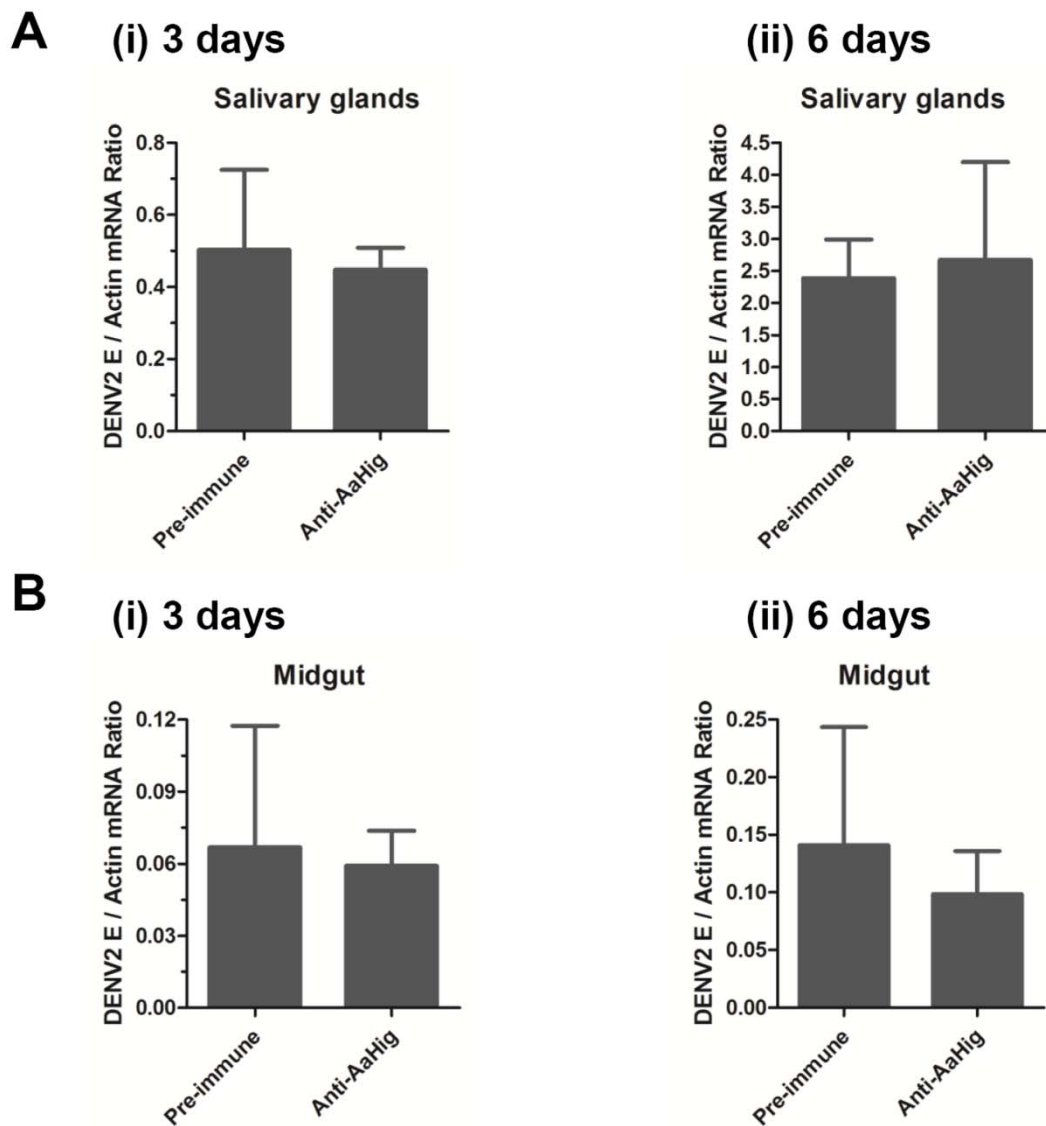

**S10 Fig. Detection of viral burden in salivary glands and midguts of *A. aegypti***

The murine AaHig antibody with 10-fold dilutions was premixed with 10 M.I.D.<sub>50</sub> DENV-2 to co-microinject into the mosquitoes. The salivary glands (A) and midguts (B) were then dissected to examine the viral load at 3 (i) and 6 (ii) days post-infection via qPCR and normalized against *A. aegypti actin*. The results were combined from 2 independent experiments. The data were analyzed statistically using the non-parametric *Mann-Whitney* test.
