# Supplementary material for: A Neuron-Specific Antiviral Mechanism Prevents Lethal Flaviviral Infection of Mosquitoes
Source: PubMed Central journal article supplement (PMC4411065; doi:10.1371/journal.ppat.1004848), 2015-04-27
Supplement: ppat.1004848.s014.pdf [file ppat.1004848.s014.pdf]

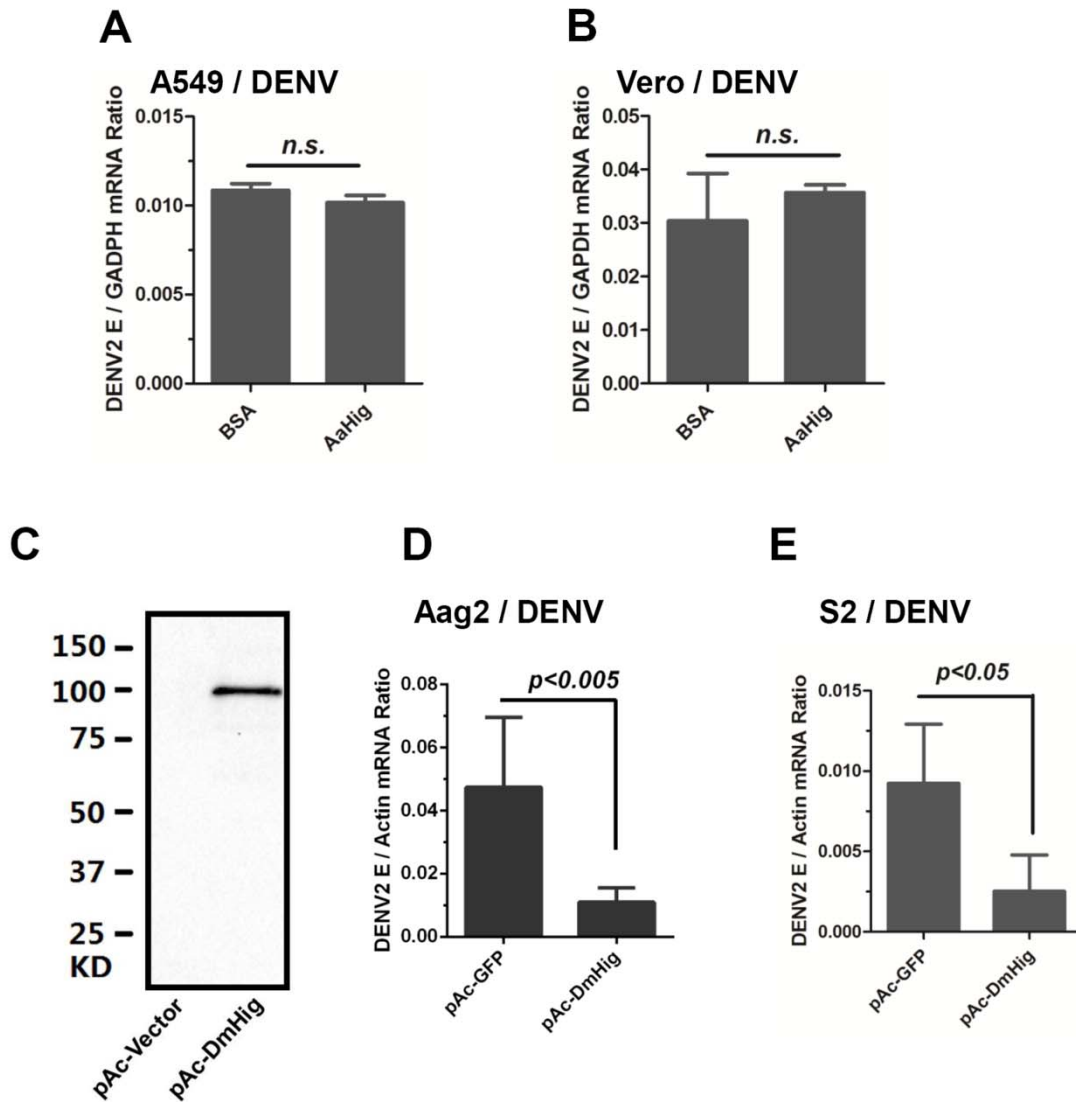

**S14 Fig. The antiviral effect of Hig protein in mammalian cells and insect cells**

(A-B) AaHig did not reduce the DENV infection in the mammalian cells. 2 $\mu$ g AaHig purified protein and 0.01 M.O.I. DENV-2 was incubated with human A549 (A) and Vero (B) cells. The same amount of BSA with DENV-2 was used as a negative control. After 48 hrs, the viral load was determined by Taqman qPCR and normalized by human *GAPDH*. The data were presented as the mean  $\pm$  standard error. The results were combined from 2 independent experiments.

(C) The ectopic expression of *Drosophila melanogaster Hig* (*DmHig*) in S2 cells. The gene of *DmHig* were cloned into the pAc5.1/V5-His A vector and expressed in the S2 cell supernatant.

The supernatant from empty vector-transfected S2 cells was used as a mock. The recombinant protein was detected with an anti-V5 antibody via western blotting.

(D-E) The antiviral effect of *DmHig* in insect cells. DmHig was overexpressed in mosquito Aag2 (D) and *Drosophila* S2 (E) cells. After 48 hrs, the 0.01 M.O.I. DENV-2 was added into the cells, and subsequently the viral load was determined by Taqman qPCR and normalized by *A. aegypti* and *D. melanogaster actins*. The data were presented as the mean  $\pm$  standard error. The result were combined from 3 independent experiments.
