# Supplementary material for: A Neuron-Specific Antiviral Mechanism Prevents Lethal Flaviviral Infection of Mosquitoes
Source: PubMed Central journal article supplement (PMC4411065; doi:10.1371/journal.ppat.1004848), 2015-04-27
Supplement: ppat.1004848.s020.pdf [file ppat.1004848.s020.pdf]

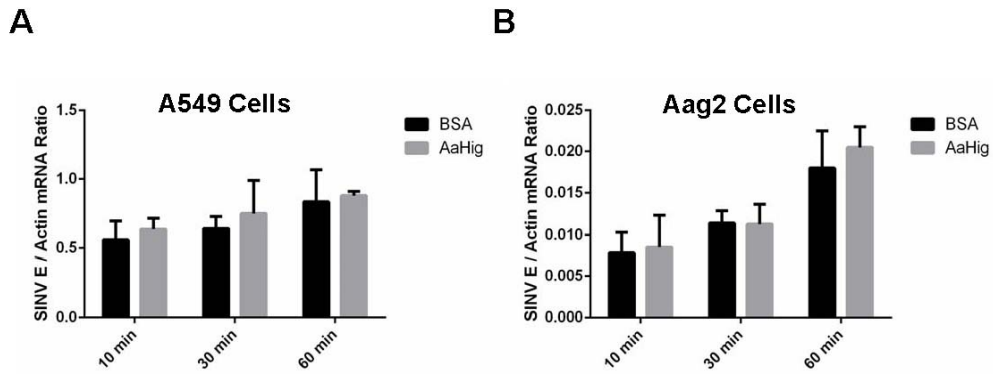

**S20 Fig. Over-expression of *AaHig* does not influence the Sindbis burden in the human and mosquito cells**

The 2 $\mu$ g *AaHig* protein was premixed with 5 M.O.I. Sindbis virus (SINV), and then we incubated the materials with human A549 cells (A) at 37 °C or mosquito Aag2 cells (B) at 28 °C for a serial time course. The same amount of BSA mixed with viruses was used as a mock control. The SINV load was determined by qPCR and normalized by human or mosquito *actins*. The experiment was repeated by three times with the similar results.
