# Supplementary material for: A Neuron-Specific Antiviral Mechanism Prevents Lethal Flaviviral Infection of Mosquitoes
Source: PLOS journal article supplement (doi:10.1371/journal.ppat.1004848), 2015-04-27
Supplement: S12 (10.1371/journal.ppat.1004848.s012) [file journal.ppat.1004848.s012]

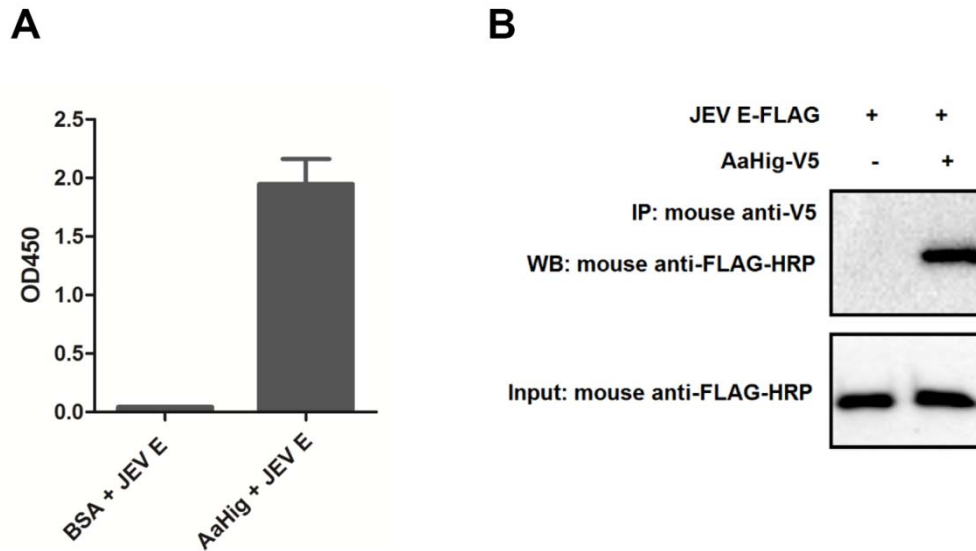

**S12 Fig. The interaction between AaHig and JEV E protein**

The interaction of purified AaHig (V5) and JEV E (FLAG) proteins was determined by ELISA (A) and co-IP (B). In the ELISA detection, the binding was probed by mouse anti-FLAG-HRP antibody. The data were presented as the mean  $\pm$  standard error. The experiment was reproduced 3 times. In the co-IP assay, the protein complex was pulled down with an anti-V5 antibody and detected using a mouse anti-FLAG-HRP antibody. We reproduced the experiment 3 times.
