# Supplementary material for: A Neuron-Specific Antiviral Mechanism Prevents Lethal Flaviviral Infection of Mosquitoes
Source: PLOS journal article supplement (doi:10.1371/journal.ppat.1004848), 2015-04-27
Supplement: S21 (10.1371/journal.ppat.1004848.s021) [file journal.ppat.1004848.s021]

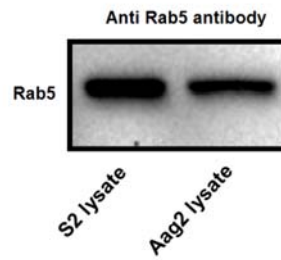

**S21 Fig. Validation of *Drosophila* Rab5 polyclonal antibody**

A rabbit anti-*Drosophila* Rab5 polyclonal antibody can efficiently probe Rab5 proteins in the lysates of S2 and Aag2 cells.
